# Supplementary material for: Determination of Plasma Concentration Reference Ranges for Risperidone and Paliperidone
Source: PubMed Central journal article supplement — CPT Pharmacometrics Syst Pharmacol. 2017 Aug 29;6(9):589–95. doi: 10.1002/psp4.12217 (PMC5613178; doi:10.1002/psp4.12217), 2017-08-29
Supplement: PSP4-6-589-s002.pdf [file PSP4-6-589-s002.pdf]

# Determination of Plasma Concentration Reference Ranges for Risperidone & Paliperidone

## *Online Supplement 2: Population PK Models*

Julia Korell<sup>1</sup>, Bruce Green<sup>1</sup>, Bart Remmerie<sup>2</sup>, An Vermeulen<sup>2</sup>

1. Model Answers Pty Ltd, Brisbane, Australia
2. Janssen R&D, a division of Janssen Pharmaceutica NV, Beerse, Belgium

### *Corresponding author:*

Bruce Green

Address: Level 5, 99 Creek Street, Brisbane, QLD, Australia, 4000

Phone: + 61 7 3221 1315

Email: [modelanswers@gmail.com](mailto:modelanswers@gmail.com)

## List of Tables

|      |                                                                                                 |    |
|------|-------------------------------------------------------------------------------------------------|----|
| S2.1 | Parameter Estimates for the ER Paliperidone PK Model . . . . .                                  | 2  |
| S2.2 | Parameter Estimates for the LAI Paliperidone PK Model . . . . .                                 | 4  |
| S2.3 | Parameter Estimates for the Parent-Metabolite PK Model for Risperidone & Paliperidone . . . . . | 6  |
| S2.4 | Parameter Estimates for the Active Moiety of i.m. LAI Risperidone . . . . .                     | 10 |

## List of Figures

|       |                                                                                                    |    |
|-------|----------------------------------------------------------------------------------------------------|----|
| S2.1  | Schematic of the ER Paliperidone PK Model . . . . .                                                | 2  |
| S2.2  | VPC for the ER Paliperidone PK Model . . . . .                                                     | 3  |
| S2.3  | Schematic of the LAI Paliperidone PK Model . . . . .                                               | 3  |
| S2.4  | VPC for the LAI Paliperidone PK Model . . . . .                                                    | 4  |
| S2.5  | Schematic of the Parent-Metabolite PK Model for Risperidone & Paliperidone . . . . .               | 5  |
| S2.6  | Goodness-of-fit Plots for Risperidone – Evaluation Dataset . . . . .                               | 7  |
| S2.7  | Goodness-of-fit Plots for Paliperidone – Evaluation Dataset . . . . .                              | 8  |
| S2.8  | VPCs for Risperidone (top) & Paliperidone (bottom) – Evaluation Dataset . . . . .                  | 9  |
| S2.9  | Schematic of the PK Model for the Active Moiety of i.m. LAI Risperidone . . . . .                  | 10 |
| S2.10 | Goodness-of-fit Plots for the Active Moiety of i.m. LAI Risperidone – Evaluation Dataset . . . . . | 11 |
| S2.11 | VPC for the Active Moiety of i.m. LAI Risperidone – Evaluation Dataset . . . . .                   | 12 |

# 1 Population PK Model for Extended Release (ER) Oral Paliperidone

Figure S2.1: Schematic of the ER Paliperidone PK Model

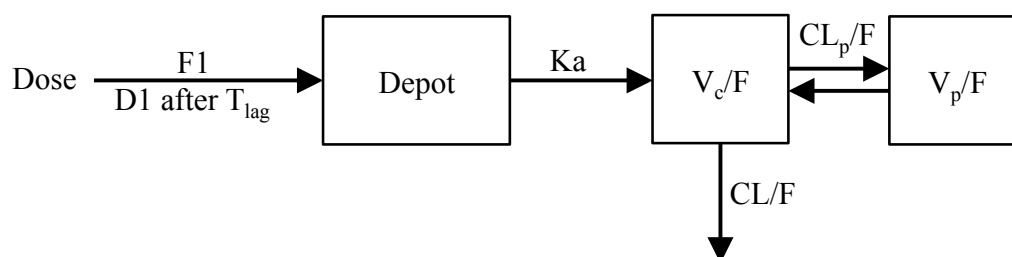

$CL/F$  = apparent clearance;  $CL_p/F$ , apparent intercompartmental flow;  $D1$  = duration of zero-order input;  $F1$  = apparent bioavailability (changes with occasion);  $Ka$  = absorption rate constant;  $T_{lag}$  = absorption lag time;  $V_c/F$  = apparent central volume of distribution;  $V_p/F$  = apparent peripheral volume of distribution.

Table S2.1: Parameter Estimates for the ER Paliperidone PK Model

| Parameter                                                 | Estimate<br>(SE%) | BSV CV%<br>(SE%)                       |
|-----------------------------------------------------------|-------------------|----------------------------------------|
| Apparent clearance ( $CL/F$ , L/hr)                       | 10.9 (11.5)       | 44.4 (18.1)                            |
| Effect of weight on $CL/F$                                | 0.727 (21.7)      |                                        |
| Effect of CrCL on $CL/F$                                  | 0.0240 (46.3)     |                                        |
| Apparent intercompartmental flow ( $CL_p/F$ , L/hr)       | 22.0 (10.0)       |                                        |
| Apparent central volume of distribution ( $V_c/F$ , L)    | 198 (6.7)         | 34.5 (31.3)                            |
| Apparent peripheral volume of distribution ( $V_p/F$ , L) | 244 (6.8)         | 28.6 (24.5)                            |
| Apparent bioavailability ( $F1$ )                         | 1 FIX             | 17.4 <sup>†</sup> (14.1 <sup>‡</sup> ) |
| Absorption lag time ( $T_{lag}$ , hr)                     | 0.761 (8.7)       |                                        |
| Duration of input ( $D1$ , hr)                            | 25. (0.7)         |                                        |
| Absorption rate constant ( $Ka$ , $hr^{-1}$ )             | 0.630 (2.0)       | 59.9 (20.3)                            |
| Residual unexplained variability (RUV, CV%)               | 20.5 (4.6)        |                                        |

BSV = between-subject variability; CrCL = creatinine clearance; CV = coefficient of variation; SE = standard error.

\*Parameterised as:  $CL = \theta_1 \times (\text{weight (kg)}/74.4)^{\theta_8} + \text{CrCL (mL/min)} \times \theta_9$ , where CrCL is capped at 150 mL/min.

<sup>†</sup> Between-occasion variability (BOV); <sup>‡</sup> SE for BOV.

Figure S2.2: VPC for the ER Paliperidone PK Model

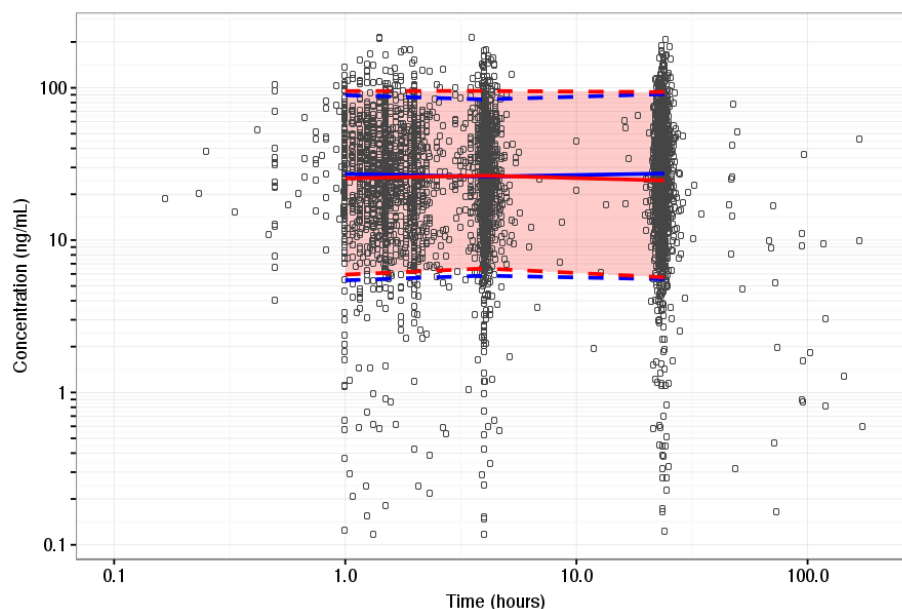

The blue and red lines represent the observed and simulated data, respectively; the solid lines represent the 50<sup>th</sup> percentile, with the dotted lines representing the 5<sup>th</sup> and 95<sup>th</sup> percentiles; while the open circles represent the observed data points.

## 2 Population PK Model for Long-acting Intramuscular (i.m.) Injectable (LAI) of Paliperidone

Figure S2.3: Schematic of the LAI Paliperidone PK Model

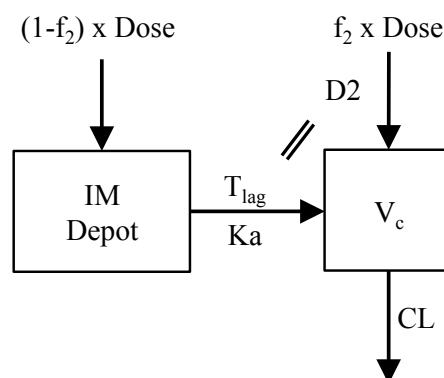

CL = clearance; D2 = duration of zero-order input into  $V_c$  (equal to  $T_{lag}$ );  $f_2$  = fraction of dose into  $V_c$ ; IM = intramuscular;  $T_{lag}$  = absorption lag time;  $V_c$  = central volume of distribution.

**Table S2.2: Parameter Estimates for the LAI Paliperidone PK Model**

| Parameter                                                                                      | Estimate<br>(SE%) | BSV CV%<br>(SE%)         | BOV CV%<br>(SE%)        |
|------------------------------------------------------------------------------------------------|-------------------|--------------------------|-------------------------|
| Clearance <sup>a</sup> (CL, L/hr)                                                              | 4.95 (1.3)        | 40.0 (1.8)               | 26.0 (2.2)              |
| Effect of CrCL on CL                                                                           | 0.376 (2.7)       |                          |                         |
| Volume of distribution <sup>b</sup> (V <sub>c</sub> , L)                                       | 391 (3.0)         | 69.0 (4.3)               | 14.0 (2.1)              |
| Effect of BMI on V <sub>c</sub>                                                                | 0.889 (0.8)       |                          |                         |
| Shift factor for females                                                                       | 0.726 (7.5)       |                          |                         |
| Absorption rate constant × 10 <sup>3</sup> . <sup>c</sup> (K <sub>a</sub> , hr <sup>-1</sup> ) | 0.488 (2.0)       | 59.0 (3.2)               |                         |
| Effect of age on K <sub>a</sub>                                                                | 0.311 (14.0)      |                          |                         |
| Effect of injection volume                                                                     | -0.359 (3.1)      |                          |                         |
| Shift factor for females                                                                       | 0.765 (7.4)       |                          |                         |
| Shift factor for deltoid muscle injection                                                      | 1.23 (3.4)        |                          |                         |
| Duration of input (D <sub>2</sub> , hr) or absorption lagtime (T <sub>lag</sub> , hr)          | 319 (0.6)         |                          |                         |
| Fraction of dose into V <sub>c</sub> <sup>d</sup> (f <sub>2</sub> )                            | 0.168 (2.1)       | 0.064 <sup>†</sup> (2.0) | 0.07 <sup>†</sup> (2.2) |
| Effect of BMI on f <sub>2</sub>                                                                | -0.642 (1.0)      |                          |                         |
| Effect of injection volume                                                                     | -0.288 (1.2)      |                          |                         |
| Shift factor for females                                                                       | 0.781 (4.1)       |                          |                         |
| Shift factor for deltoid muscle injection                                                      | 1.37 (3.2)        |                          |                         |
| Shift factor for deltoid muscle 1.5 inch needle                                                | 1.54 (6.0)        |                          |                         |
| Proportional residual unexplained variability (RUV, CV%)                                       | 22.0 (2.8)        |                          |                         |

BMI = body mass index; BOV = between-occasion variability; BSV = between-subject variability; CrCL = creatinine clearance; CV = coefficient of variation; SE = standard error. <sup>†</sup> Standard deviation computed for paliperidone palmitate 100 mg eq. gluteal muscle injection for a male subject with a BMI of 26.8 kg/m<sup>2</sup>.

<sup>a</sup> CL = 4.95 × (CrCL (mL/min)/110.6)<sup>0.376</sup>. <sup>b</sup> V<sub>c</sub> = 391 × (BMI (kg/m<sup>2</sup>)/26.8)<sup>0.889</sup> × 0.726 if female.

<sup>c</sup> K<sub>a</sub> = 0.488 × 10<sup>-3</sup> × (Age (yrs)/42)<sup>0.311</sup> × injection volume (mL)<sup>-0.359</sup> × 0.765 if female × 1.23 if deltoid injection.

<sup>d</sup> f<sub>2</sub> = 0.168 × (BMI (kg/m<sup>2</sup>)/26.8)<sup>-0.642</sup> × injection volume (mL)<sup>-0.288</sup> × 0.781 if female × 1.37 if deltoid injection × 1.54 if deltoid injection with 1.5 inch needle.

**Figure S2.4: VPC for the LAI Paliperidone PK Model**

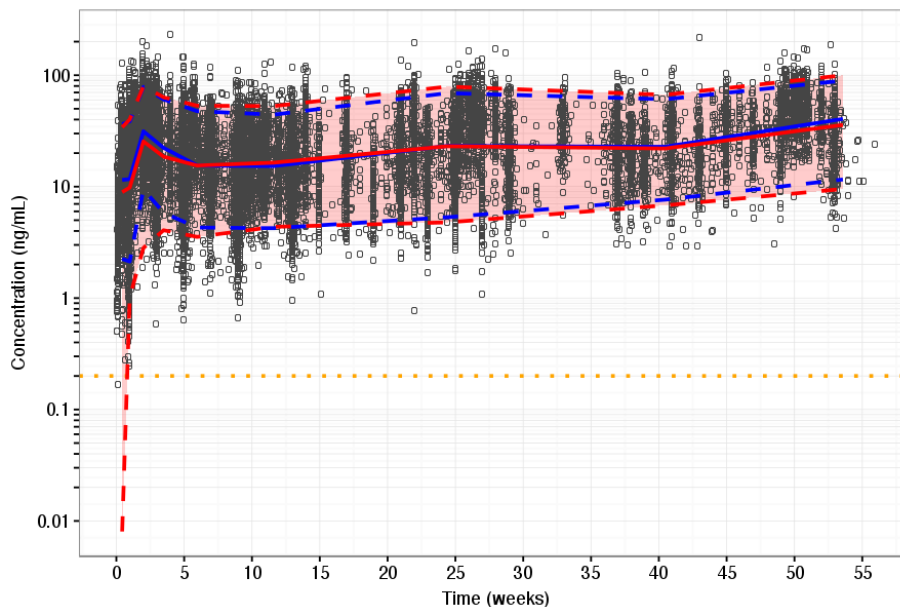

The blue and red lines represent the observed and simulated data, respectively; the solid lines represent the 50<sup>th</sup> percentile, with the dashed lines representing the 5<sup>th</sup> and 95<sup>th</sup> percentiles; while the open circles represent the observed data points, and the orange dotted horizontal line indicates the lower limit of quantification (LLOQ).

### 3 Population PK Model for Oral Risperidone

The following modifications were undertaken during the update of the population PK model for oral risperidone:

- Inclusion of an additional parameter describing the apparent clearance of risperidone for unknown concomitant administration of carbamazepine.
- A joint estimate of the apparent clearance of paliperidone in subjects where concomitant administration or absence of concomitant carbamazepine was known.
- Inclusion of an additional parameter describing the apparent clearance of paliperidone where concomitant administration of carbamazepine was unknown.
- Removal of the study effect that allowed for differing proportions of intermediate and extensive CYP2D6 metabolisers in single dose trials.
- Inclusion of age as a covariate effect on the apparent clearance of risperidone, which increased linearly to an estimated age cut-point, and declined thereafter in a non-linear manner.

Figure S2.5: Schematic of the Parent-Metabolite PK Model

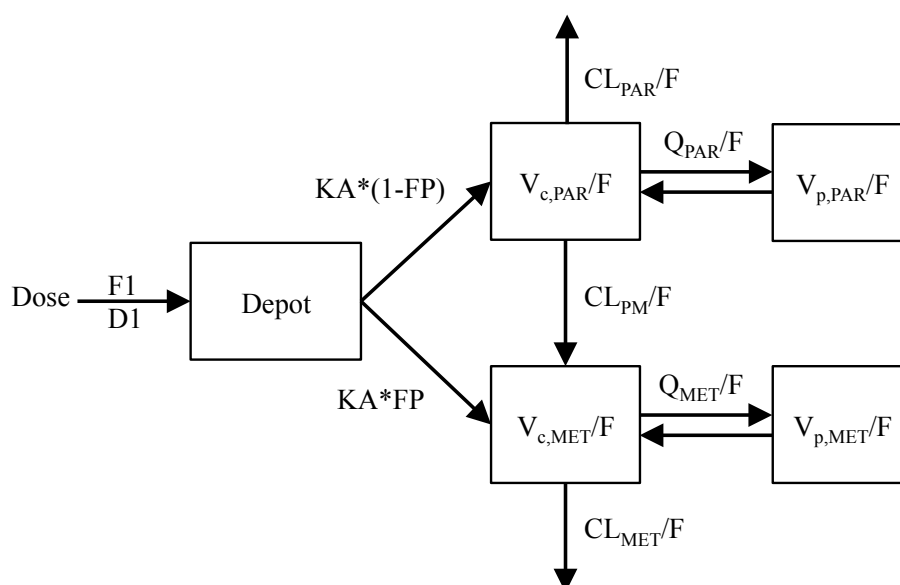

$CL_{MET}/F$  = apparent clearance of metabolite;  $CL_{PAR}/F$  = apparent clearance of parent;  $CL_{PM}/F$  = apparent clearance from parent to metabolite;  $D1$  = duration of zero-order input into the depot compartment;  $F1$  = apparent bioavailability;  $FP$  = fraction of dose converted to 9-OH (first-pass metabolism);  $KA$  = absorption rate constant;  $Q_{MET}/F$  = apparent intercompartmental flow of metabolite;  $Q_{PAR}/F$  = apparent intercompartmental flow of parent;  $V_{c,MET}/F$  = apparent central volume of distribution of metabolite;  $V_{c,PAR}/F$  = apparent central volume of distribution of parent;  $V_{p,PAR}/F$  = apparent peripheral volume of distribution of parent;  $V_{p,MET}/F$  = apparent peripheral volume of distribution of metabolite.

**Table S2.3: Parameter Estimates for the Parent-Metabolite PK Model**

| Parameter                                                                         | Estimate<br>(SE%) | BSV CV%<br>(SE%)        | BOV CV%<br>(SE%) |
|-----------------------------------------------------------------------------------|-------------------|-------------------------|------------------|
| Apparent bioavailability (F1)                                                     |                   |                         | 46.9 (18.0)      |
| Absorption lag time (ALAG1, h)                                                    | 0.168 (4.9)       | 38.1 (35.9)             |                  |
| Duration of input (D1, h)                                                         | 0.447 (4.9)       | 71.3 (48.9)             | 146 (22.5)       |
| Absorption rate constant (KA, /h)                                                 | 2.01 (8.2)        | 91.4 (38.8)             | 127 (29.7)       |
| Fraction of dose converted to paliperidone (FP, %)                                |                   | 102 <sup>a</sup> (20.0) |                  |
| Poor metabolisers                                                                 | 3.69 (30.6)       |                         |                  |
| Intermediate metabolisers                                                         | 7.10 (37.6)       |                         |                  |
| Extensive metabolisers                                                            | 42.7 (5.7)        |                         |                  |
| Apparent intercompartmental flow of parent (Q <sub>PAR</sub> , L/h)               | 2.67 (8.5)        | 78.0 (83.3)             |                  |
| Apparent clearance of parent (CL <sub>PAR</sub> , L/h)                            |                   |                         | 96.3 (56.8)      |
| No concomitant CBZ (L/h)                                                          | 5.95 (18.7)       |                         |                  |
| With concomitant CBZ (L/h)                                                        | 12.1 (19.8)       |                         |                  |
| Unknown concomitant CBZ (L/h)                                                     | 5.63 (24.2)       |                         |                  |
| Cut point for effect of age on CL <sub>PAR</sub>                                  | 23.2 (12.3)       |                         |                  |
| Effect of age on CL <sub>PAR</sub>                                                | -0.769 (34.3)     |                         |                  |
| Apparent clearance from parent to metabolite (CL <sub>PM</sub> , L/h)             |                   | 42.9 (12.8)             |                  |
| Poor metabolisers                                                                 | 1.47 (15.5)       |                         |                  |
| Intermediate metabolisers                                                         | 9.01 (15.4)       |                         |                  |
| Extensive metabolisers                                                            | 17.5 (7.0)        |                         |                  |
| Apparent central volume of distribution of parent (V <sub>c,PAR</sub> , L)        | 113 (4.2)         | 21.0 (40.5)             |                  |
| Apparent peripheral volume of distribution of parent (V <sub>p,PAR</sub> , L)     | 71.9 (13.8)       | 50.0 (68.0)             |                  |
| Apparent intercompartmental flow of metabolite (Q <sub>MET</sub> , L/h)           | 1.54 (8.4)        | 0 FIXED                 |                  |
| Apparent clearance of metabolite (CL <sub>MET</sub> , L/h)                        |                   | 16.5 (31.9)             |                  |
| Known concomitant CBZ (L/h)                                                       | 5.50 (3.5)        |                         |                  |
| Unknown concomitant CBZ (L/h)                                                     | 4.94 (5.4)        |                         |                  |
| Apparent central volume of distribution of metabolite (V <sub>c,MET</sub> , L)*   | 113 (4.2)         | 21.0 (40.5)             |                  |
| Apparent peripheral volume of distribution of metabolite (V <sub>p,MET</sub> , L) | 83.3 (9.9)        | 56.7 (64.5)             |                  |
| Mixture for metabolising status (%)                                               |                   |                         |                  |
| Poor metabolisers                                                                 | 9.63 (18.4)       |                         |                  |
| Intermediate metabolisers                                                         | 23.0 (22.3)       |                         |                  |
| Extensive metabolisers                                                            | 67.4              |                         |                  |
| Proportional residual unexplained variability for risperidone (CV%)               | 29.5 (11.7)       |                         |                  |
| Proportional residual unexplained variability for paliperidone (CV%)              | 31.1 (10.7)       |                         |                  |

BOV = between-occasion variability; BSV = between-subject variability; CV = coefficient of variation; CBZ = carbamazepine;  
SE = standard error. \*Same as V<sub>c,PAR</sub>, <sup>a</sup>%SD in the logit domain.

Figure S2.6: Goodness-of-fit Plots for Risperidone – Evaluation Dataset

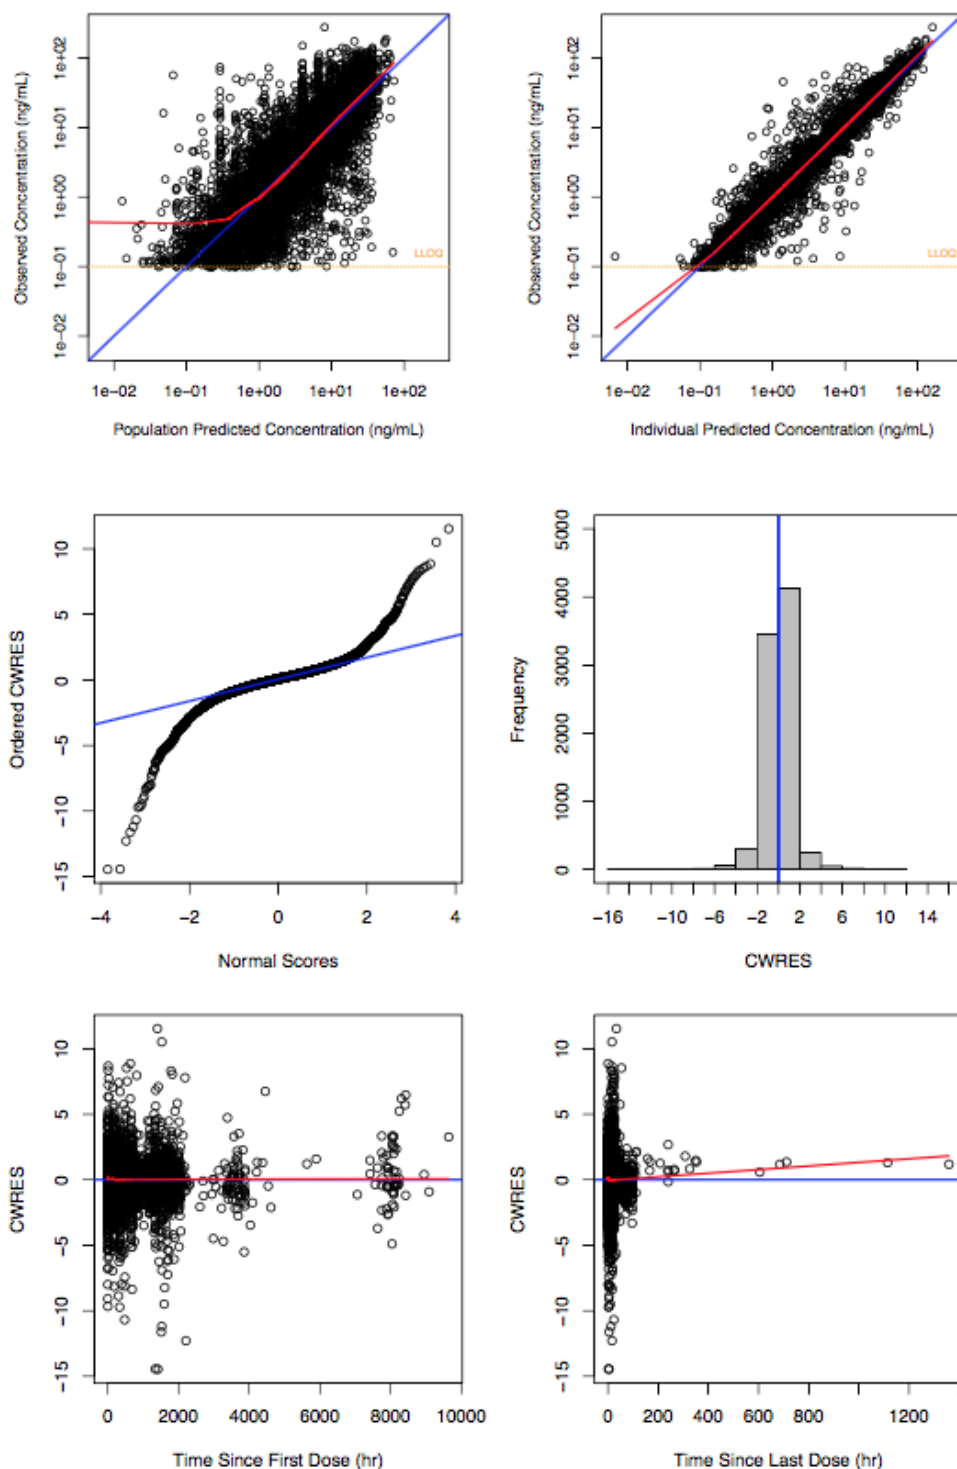

The blue solid lines represent the expected trend, the solid red lines represent the trend of the data, and the orange horizontal lines indicate the LLOQ; CWRES = conditional weighted residuals.



Figure S2.7: Goodness-of-fit Plots for Paliperidone – Evaluation Dataset

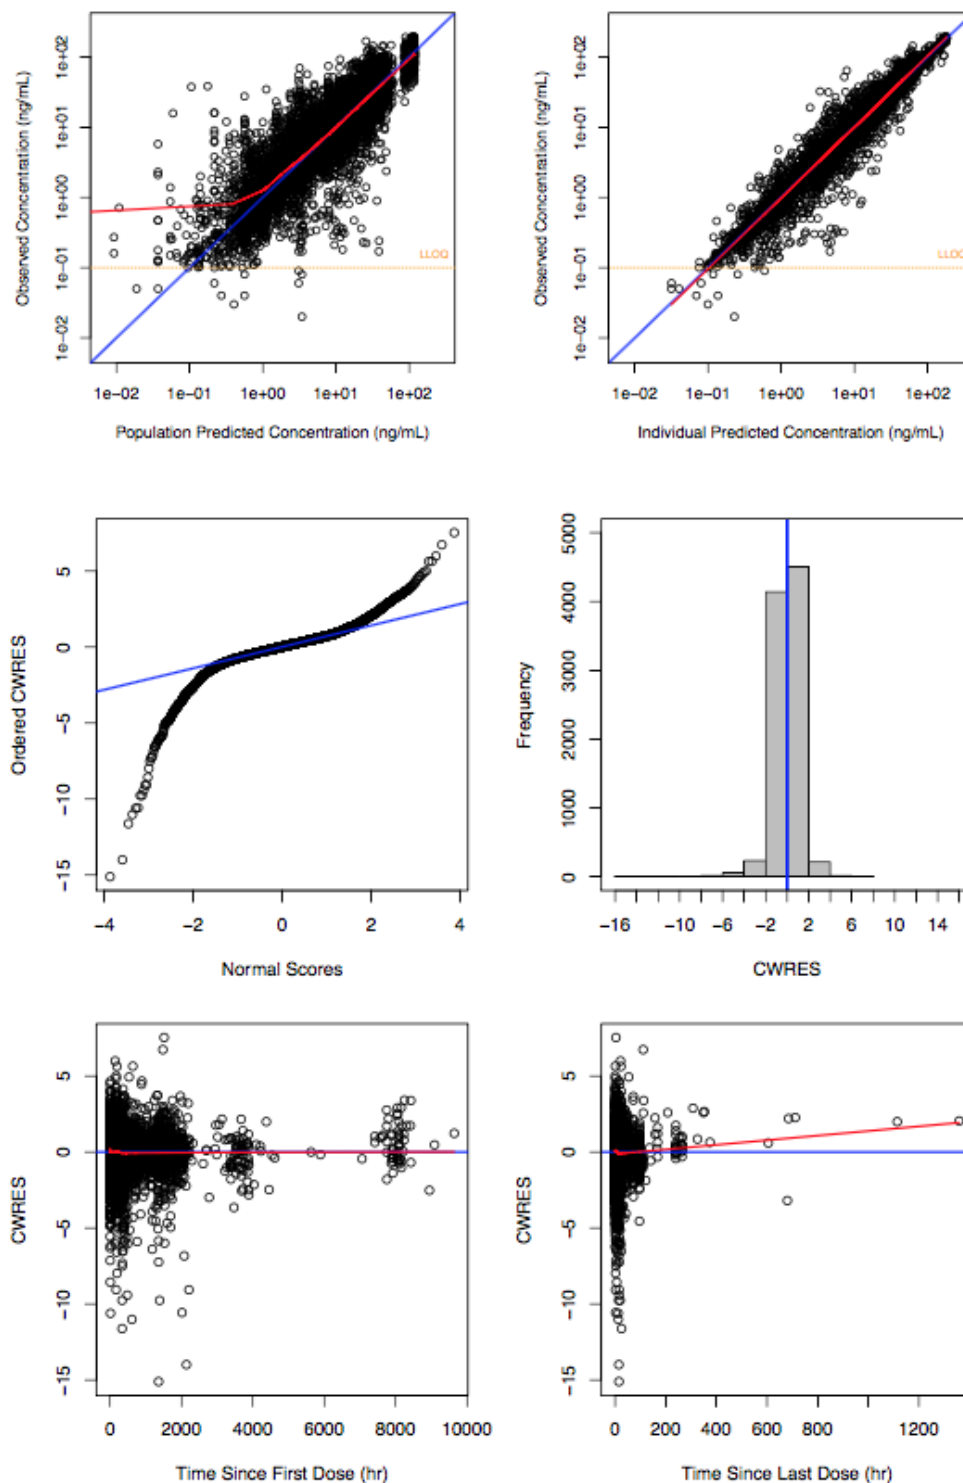

The blue solid lines represent the expected trend, the solid red lines represent the trend of the data, and the orange horizontal lines indicated the LLOQ; CWRES = conditional weighted residuals.

Figure S2.8: VPCs for Risperidone (top) & Paliperidone (bottom) – Evaluation Dataset

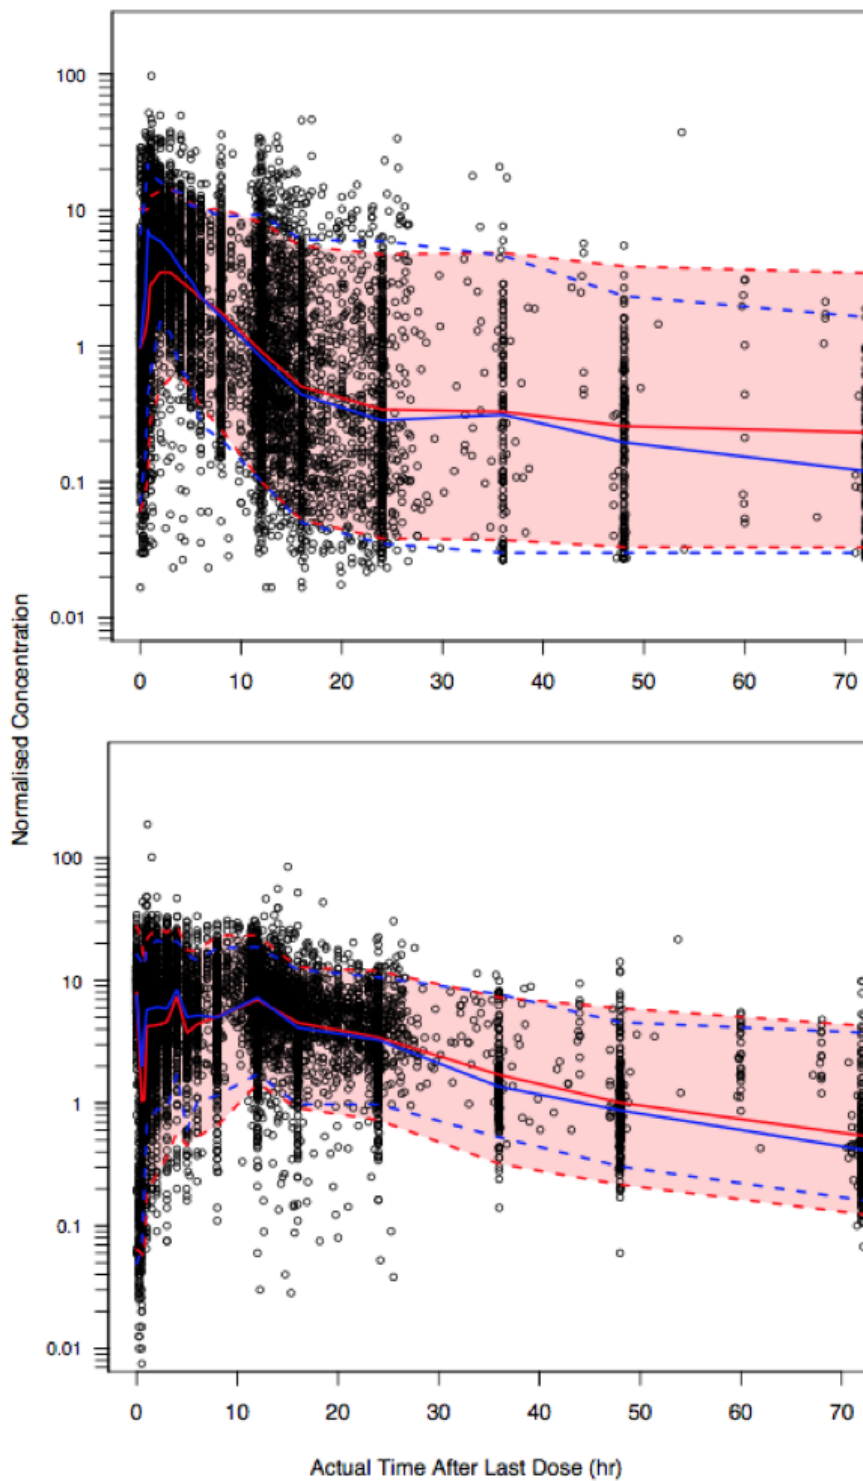

The blue and red lines represent the observed and simulated data, respectively; the solid lines represent the 50<sup>th</sup> percentiles, with the dashed lines representing the 5<sup>th</sup> and 95<sup>th</sup> percentiles; the open circles represent the observed data points colour-coded by study; and the orange horizontal lines indicated the LLOQ.

## 4 Population PK Model for the Active Moiety of i.m. Risperidone Administered as LAI

Figure S2.9: Schematic of the PK Model for the Active Moiety of i.m. LAI Risperidone

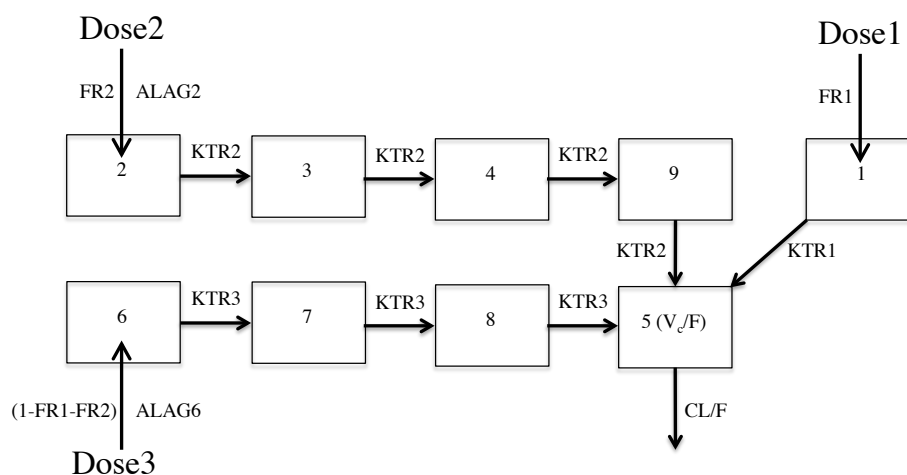

ALAG2 = absorption lagtime of the second pathway; ALAG6 = absorption lagtime of the third pathway; CL/F = apparent clearance; F = apparent bioavailability; FR1 = fraction of dose absorbed via the first pathway; FR2 = fraction of dose absorbed via the second pathway; KTR1 = first-order absorption rate constant of the first pathway; KTR2 = transit absorption rate constant of the second pathway; KTR3 = transit absorption rate constant of the third pathway;  $V_c/F$  = apparent central volume of distribution.

Table S2.4: Parameter Estimates for the Active Moiety of i.m. LAI Risperidone

| Parameter                                                      | Estimate<br>(SE%) | BSV CV%<br>(SE%)          | BOV CV%<br>(SE%) |
|----------------------------------------------------------------|-------------------|---------------------------|------------------|
| Apparent Clearance (CL/F, L/hr)                                | 4.27 (8.0)        | 39.1 (7.88)               |                  |
| Effect of LBW on CL/F                                          | 0.725 (32.3)      |                           |                  |
| Apparent Central Volume of Distribution ( $V_c/F$ , L)         | 351 (3.48)        |                           |                  |
| First-order Absorption Rate Constant (KTR1, hr <sup>-1</sup> ) | 100 FIX (NA)      |                           |                  |
| Absorption Transit Rate Constant 2 (KTR2, hr <sup>-1</sup> )   | 0.00730 (5.06)    | 66.7 (15.5)               |                  |
| Absorption Transit Rate Constant 3 (KTR3, hr <sup>-1</sup> )   | 0.0177 (4.63)     |                           | 41.5 (11.3)      |
| Fraction of Dose via Pathway 1 (FR1, %) <sup>#</sup>           | 3.21 (3.74)       | 32.1 (21.4) <sup>B3</sup> |                  |
| Fraction of Dose via Pathway 2 (FR2, %) <sup>#</sup>           | 21.7 (8.96)       | 82.4 (10.5) <sup>B1</sup> |                  |
| Effect of Formulation Batch 3 on FR2 <sup>*</sup>              | 3.56 (15.1)       | 46.4 (17.5) <sup>B3</sup> |                  |
| Fraction of Dose via Pathway 3 ((1-FR2-FR1), %)                | 75.09 (NA)        |                           |                  |
| Lag-time for Pathway 2 (ALAG2, hr)                             | 0 FIX (NA)        |                           |                  |
| Lag-time for Pathway 3 (ALAG6, hr)                             | 613 (0.45)        |                           |                  |
| Residual unexplained variability for Batch 1 (RUV, CV%)        | 28.4 (2.87)       |                           |                  |
| Residual unexplained variability for Batch 3 (RUV, CV%)        | 47.4 (3.22)       |                           |                  |

B1 = Batch 1; B3 = Batch 3; BSV = between Subject Variability; BOV = between-occasion variability; CV = coefficient of variation; LBW = lean body weight; SE = standard error. <sup>#</sup> = parameter converted out of a logit domain for ease of interpretation; <sup>\*</sup> = represents an increase in FR2 to 49.1% when converted out of a logit.

Figure S2.10: Goodness-of-fit Plots for the Active Moiety of i.m. LAI Risperidone – Evaluation Dataset

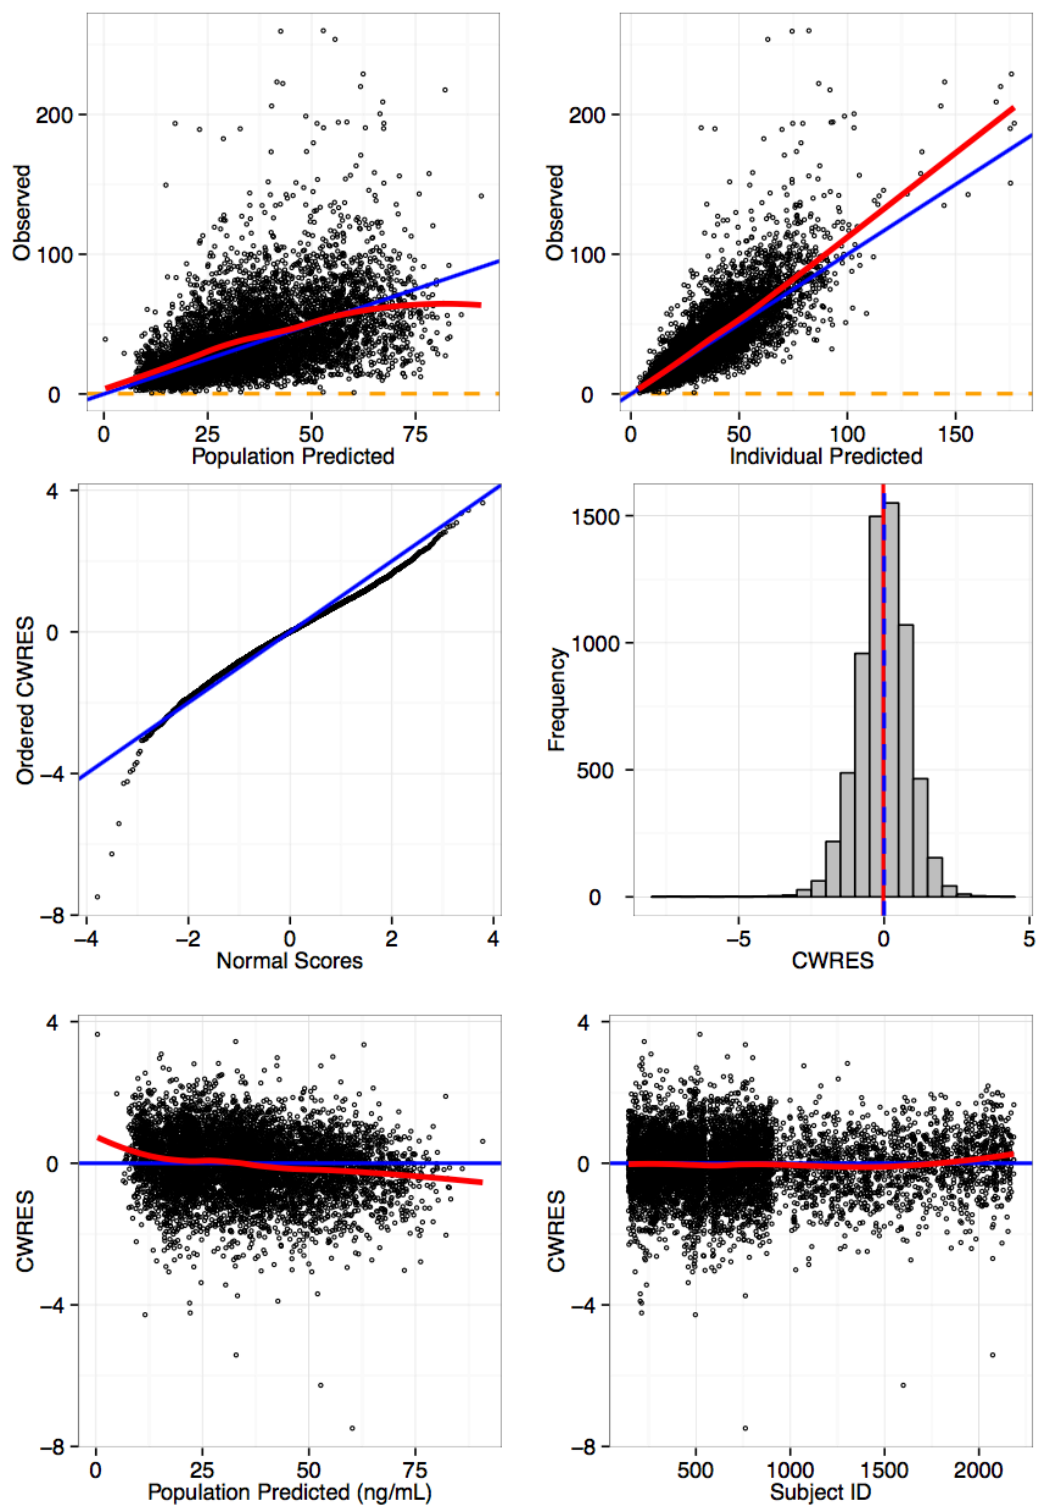

The blue solid lines represent the expected trend, the solid red lines represent the trend of the data, and the orange horizontal lines indicate the LLOQ; CWRES = conditional weighted residuals.

Figure S2.11: VPC for the Active Moiety of i.m. LAI Risperidone – Evaluation Dataset

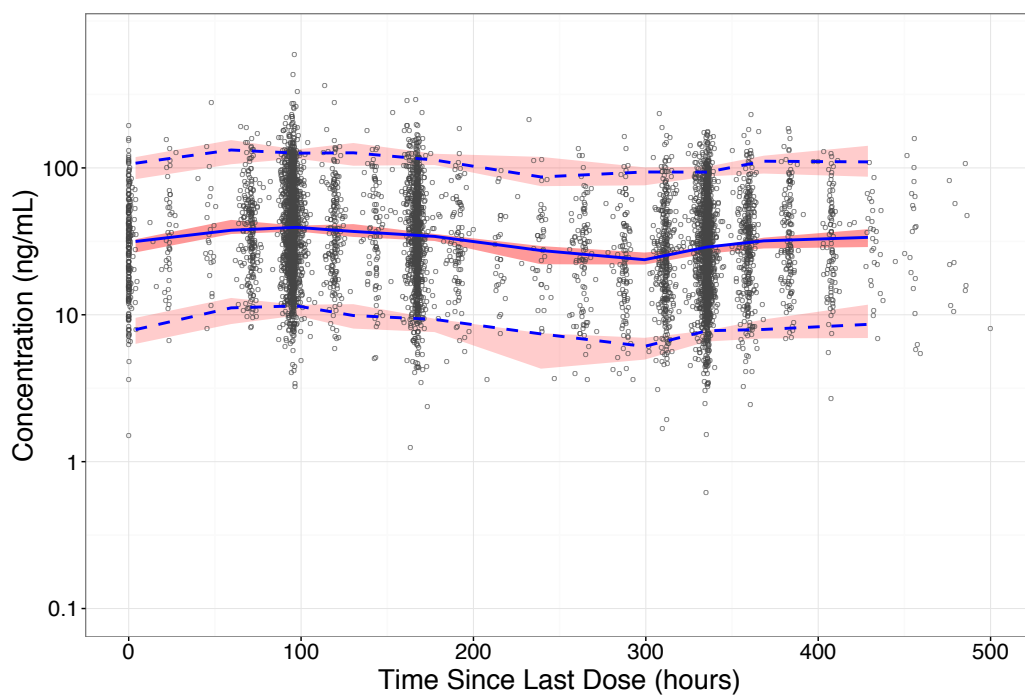

The blue lines represent the observed data, where the solid line represents the 50<sup>th</sup> percentile, with the dashed lines representing the 5<sup>th</sup> and 95<sup>th</sup> percentiles; the red shaded areas represent the corresponding 95% CIs for the simulated data; and the open circles represent the observed data points.
